# Supplementary material
Source: MDPI journal article supplement (https://www.mdpi.com/2304-6740/11/6/235)
Supplement: s1 [file s1 › inorganics-2366589-supplementary.pdf]

## ***Supplementary Materials***

### **Precipitative Coating of Calcium Phosphate on Microporous Silica-Titania Hybrid Particles in Simulated Body Fluid**

**Reo Kimura,<sup>a</sup> Kota Shiba,<sup>b,\*</sup> Kanata Fujiwara,<sup>a</sup>  
Yanni Zhou,<sup>a</sup> Iori Yamada,<sup>a,c</sup> Motohiro Tagaya<sup>a,\*\*</sup>**

<sup>a</sup> *Department of Materials Science and Bioengineering Technology, Nagaoka University of  
Technology, Kamitomioka 1603-1, Nagaoka, Niigata 940-2188, Japan*

<sup>b</sup> *Center for Functional Sensor & Actuator, Research Center for Functional Materials, National  
Institute for Materials Science (NIMS), 1-1, Namiki, Tsukuba, Ibaraki, 305-0044, Japan*

<sup>c</sup> *Research Fellow of the Japan Society for the Promotion of Science (DC), 5-3-1 Koji-machi,  
Chiyoda-ku, Tokyo 102-0083, Japan*

---

**Author to whom correspondence should be addressed:**

\* Tel: +81-29-860-4603, Fax: +81-29-860-4706, E-mail: SHIBA.Kota@nims.go.jp

\*\* Tel: +81-258-47-9345, Fax: +81-258-47-9300, E-mail: tagaya@mst.nagaokaut.ac.jp

**Figure S1**

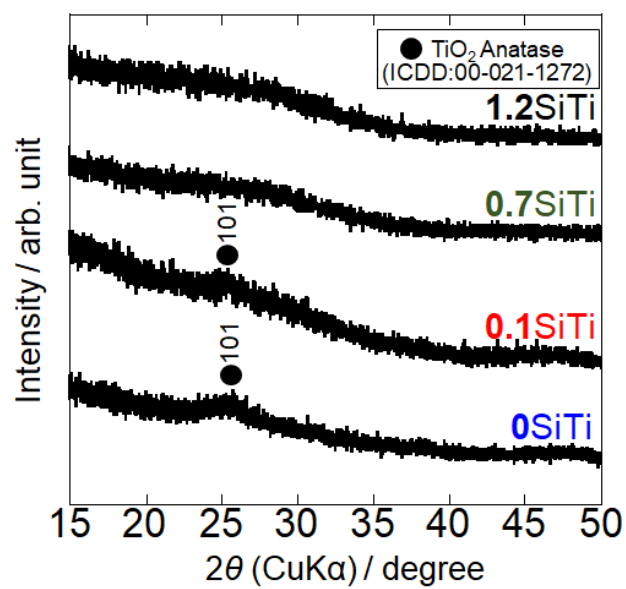

**Figure S1.** XRD patterns of the SiTi nanoparticles.

**Figure S2**

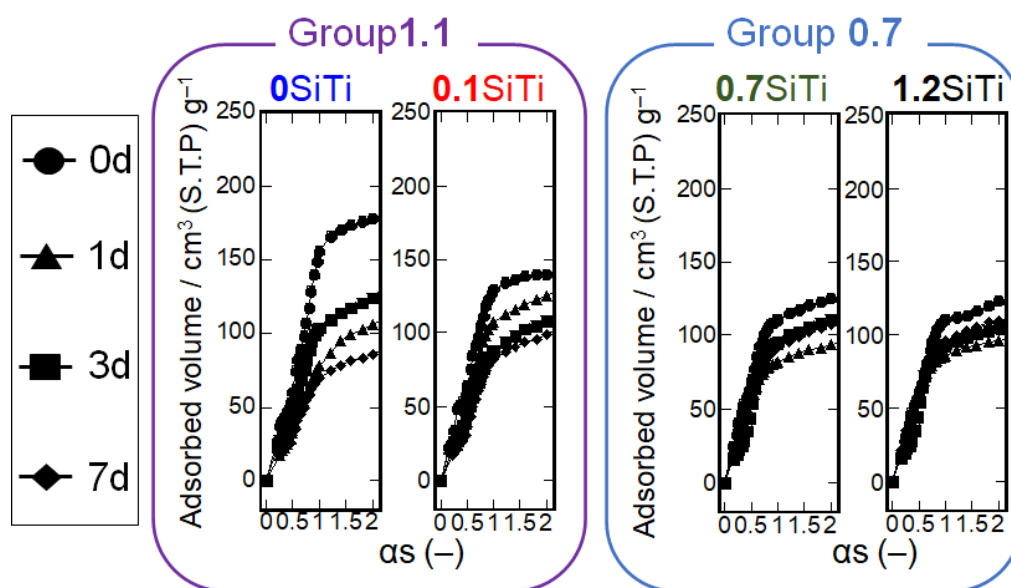

**Figure S2.**  $\alpha_s$ -plots of the SiTi nanoparticles with the immersion time Xd (X days, X=0, 1, 3, 7) in SBF.

**Figure S3**

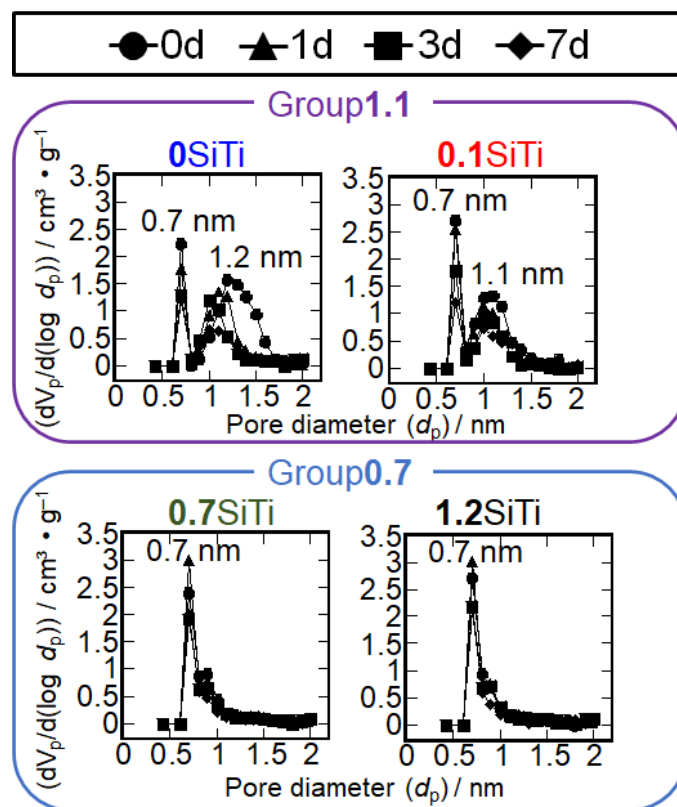

**Figure S3.** The MP pore size distribution of SiTi nanoparticles with the immersion time in SBF.

**Figure S4**

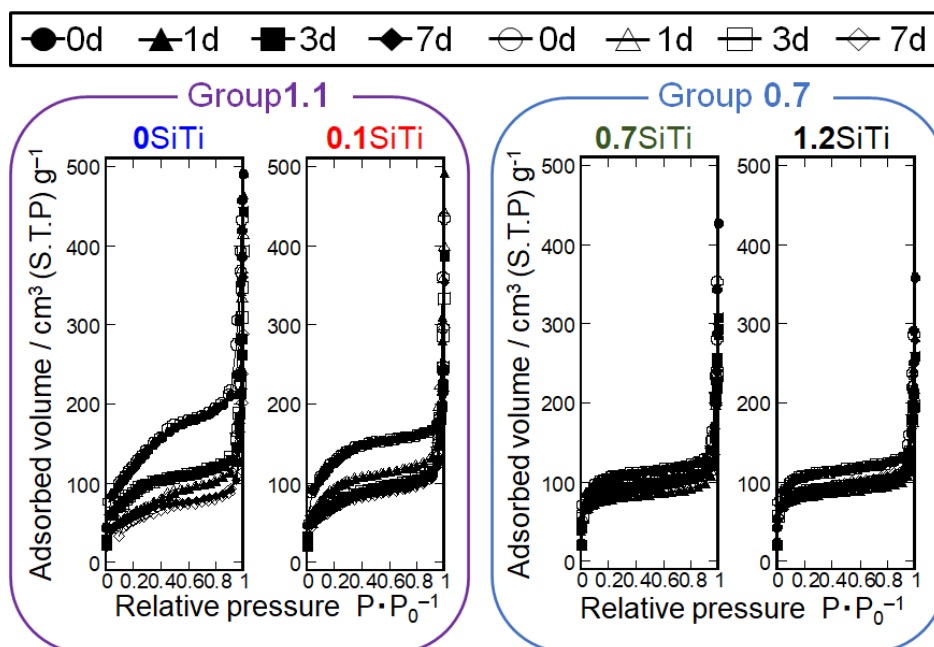

**Figure S4.**  $N_2$  adsorption (close marks) and desorption (open marks) isotherms of the SiTi nanoparticles with the immersion time in SBF.

**Figure S5**

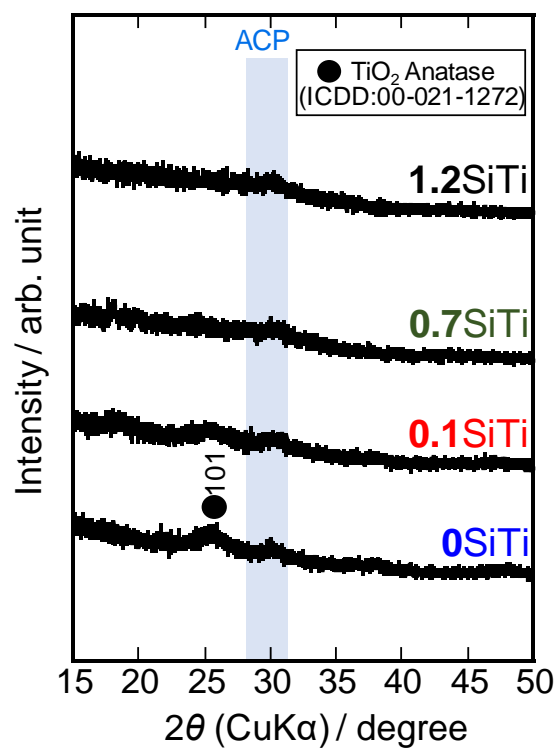

**Figure S5.** XRD patterns of the SiTi nanoparticles at the immersion time in SBF for 14 days.
